# Supplementary material for: Comprehensive Study on Carbon-Coated Silver for Improved Tribo-Electrical and Wetting Performance
Source: MDPI journal article supplement (doi:10.3390/c10010016), 2024-02-04
Supplement: s1 [file s1]

## Supplementary Material

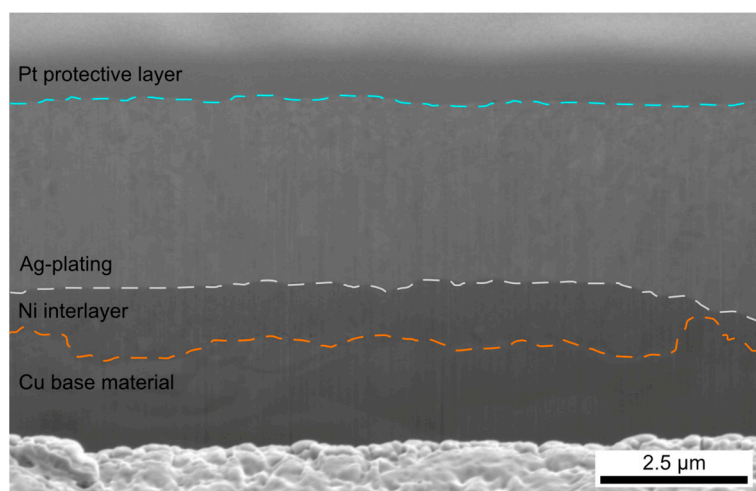

**Figure S1.** FIB cross section of silver-plated copper electrical contact. The platinum layer was deposited using the SEM with the purpose of protecting the sample and to minimize the curtaining effect during ion milling.

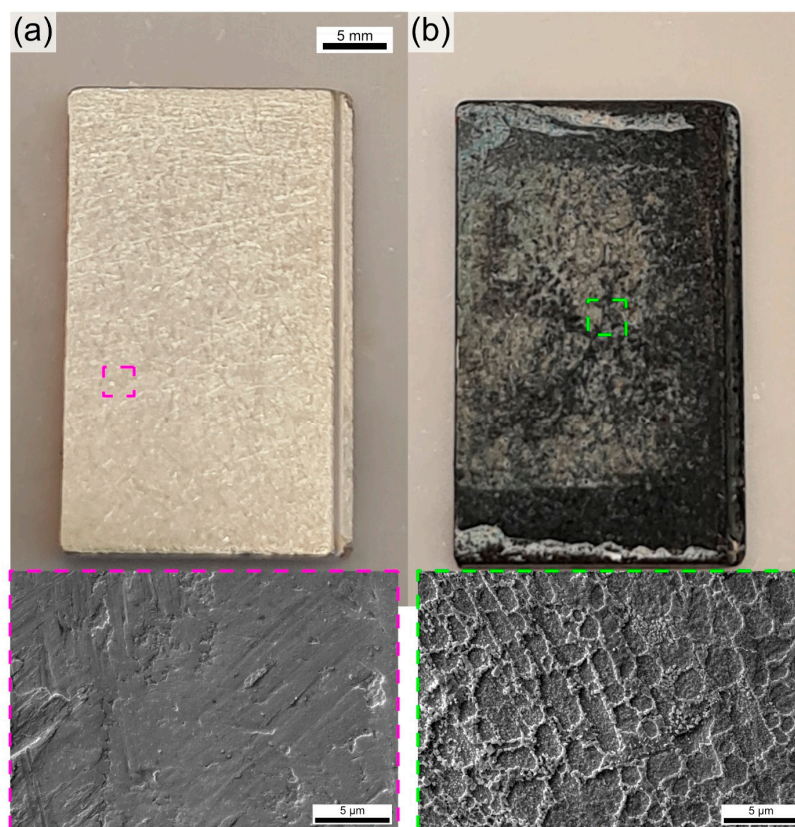

**Figure S2.** Silver sample (a) before and (b) after being subjected to sulfur-rich atmosphere. Highlighted regions show SEM micrographs of the surface before and after the accelerated tarnishing process.

Table S1. Colloid, dispersion, and EPD parameters.

|                              | GF    | CNT   | CNH    |
|------------------------------|-------|-------|--------|
| Isopropyl alcohol volume /ml | 0.2   | 0.2   | 0.05   |
| CNP concentration /mg/ml     | 80    | 80    | 70     |
| TEA volume /ml               | 10    | 5     | 5      |
| Homogenization speed /rpm    | 7,000 | 7,000 | 12,000 |
| Homogenization time /min     | 10    | 5     | 10     |
| Ultrasound /min              | 10    | 10    | 015    |

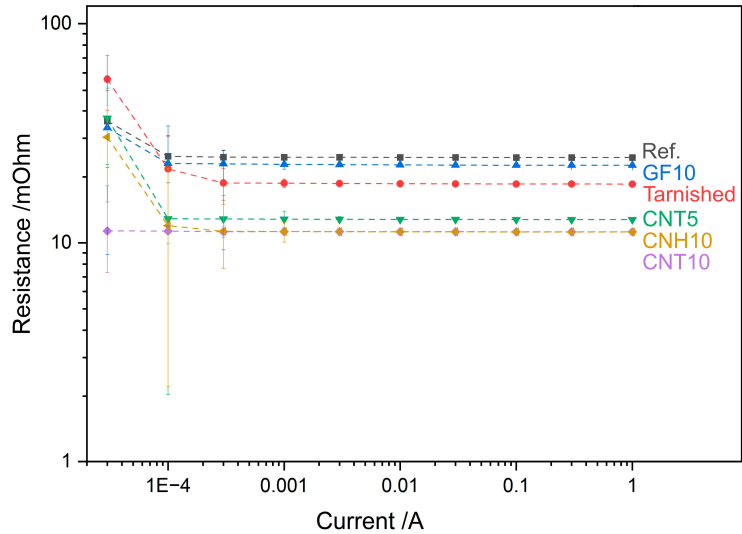

Figure S3. Current-dependent ECR of references, tarnished, and coated samples.



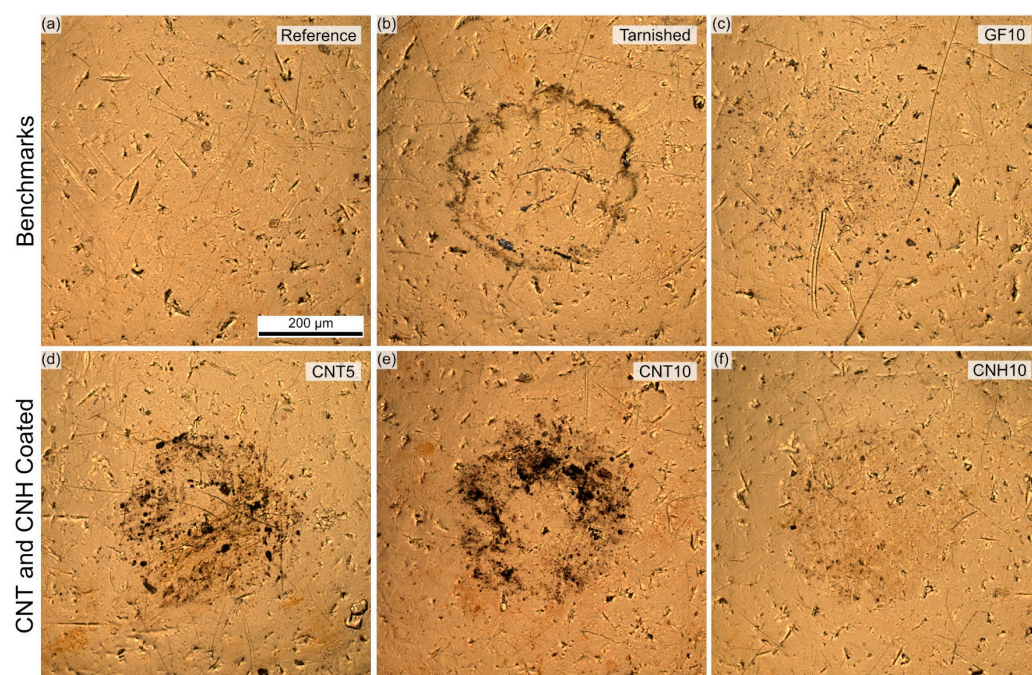

**Figure S4.** CLSM micrograph of counter electrodes after ECR measurements of (a) reference, (b) tarnished, (c) GF10, (d) CNT5, (e) CNT10, and (f) CNH10 sample.

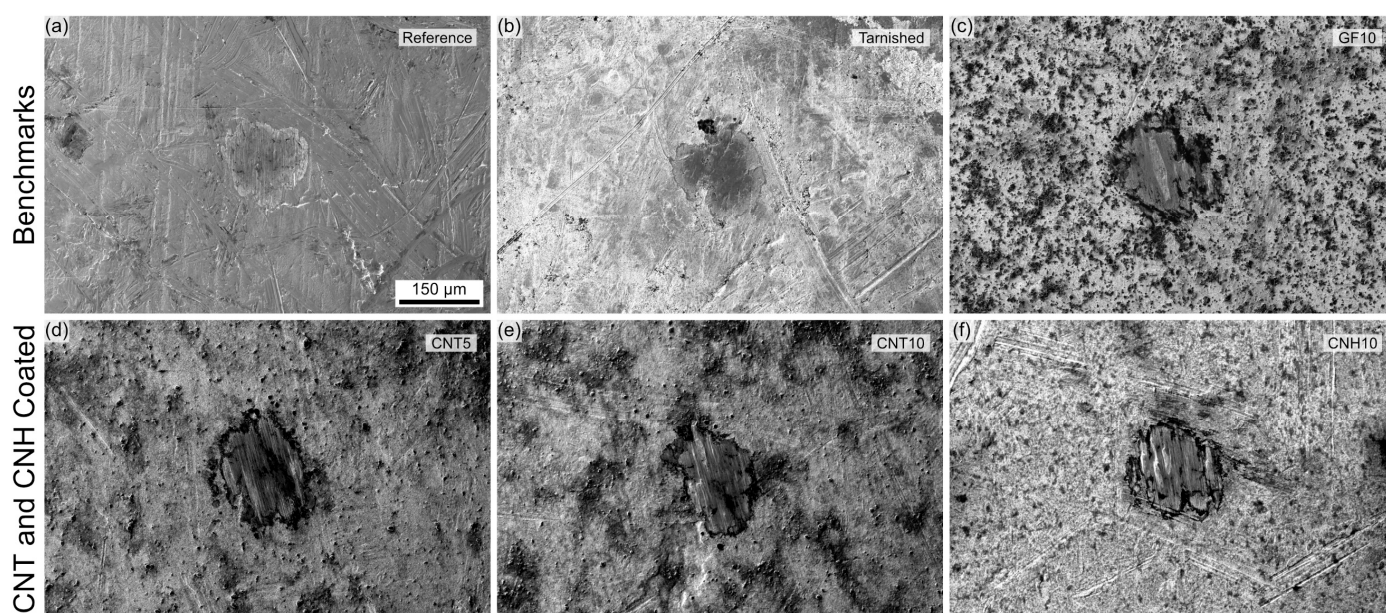

**Figure S5.** Secondary electron micrograph of fretting marks after 5,000 cycles of (a) reference sample, (b) tarnished sample, (c) GF10, (d) CNT5, (e) CNT10, and (f) CNH10. Micrographs (a) and (b) were acquired at 15 kV due to the presence of surface contaminants, whereas the rest were acquired at 5 kV acceleration voltage.

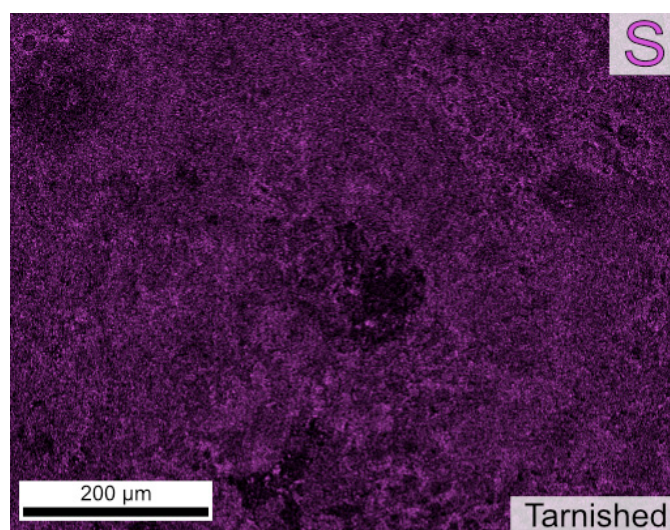

**Figure S6.** EDS map of the fretting mark after 5,000 cycles in the tarnished sample showing the signal for sulfur.
